# Supplementary material
Source: Springer Nature journal article supplement (https://www.springermedizin.de/resource/supplementary/12967_2011_831_MOESM1_ESM.PDF/9577132)

## Hematoxylin-eosin sections of representative slides from GIST 1, 3 and 4

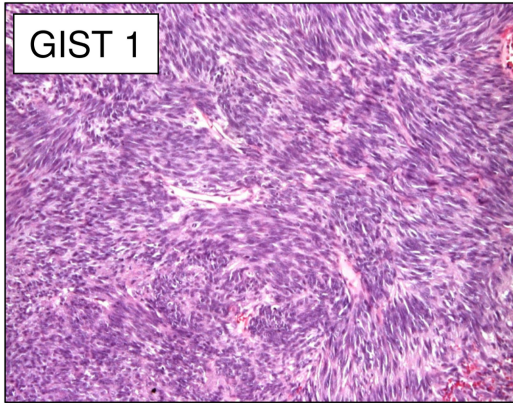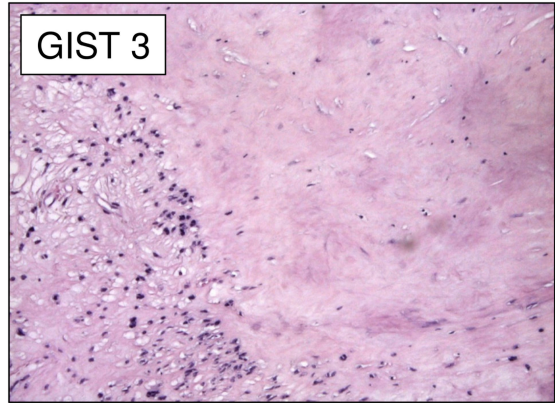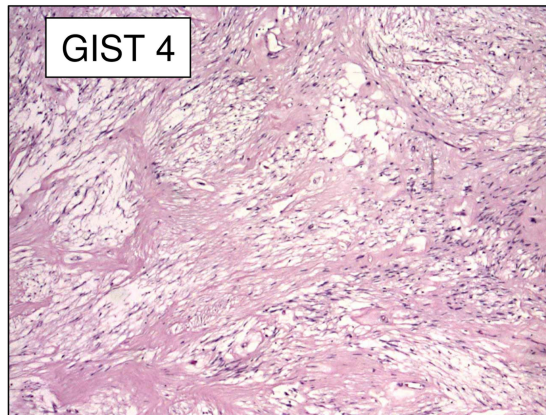

Supplement: MOESM1 [file 9577132]
